# Supplementary material for: Activity coefficients in deep eutectic solvents: implications for the solvent extraction of metals
Source: Royal Society of Chemistry journal article supplement (doi:10.1039/c7nj03736h), 2018-01-01
Supplement: c7nj03736h1.pdf [file c7nj03736h1.pdf]

Activity coefficients in deep eutectic solvent: Implications for the solvent extraction of metals,  
Supporting information.

## Contents

|         |                                                                   |
|---------|-------------------------------------------------------------------|
| Page 1  | Reagents, materials and general conditions                        |
| Page 3  | Acceptor number measurement with the iron dye                     |
| Page 4  | Cobalt extraction by aliquat 336                                  |
| Page 5  | Cadmium, zinc, palladium extractions by aliquat 336               |
| Page 8  | Palladium and rhenium extractions with aliquat 336                |
| Page 10 | Gallium and indium extractions with cyanex 923                    |
| Page 11 | Extractions by cyanex 301 of cadmium, nickel, palladium and zinc. |
| Page 20 | Thermochromism of cobalt solutions in DES / water                 |

## Experimental

### *Reagents and materials*

All reagents unless otherwise stated were purchased from Aldrich and were used as supplied. Cyanex 923 (A trialkyl phosphine oxide) was purchased from Cytec. Solvent 70 (Aliphatic kerosene) was purchased from Statoil. Suprapure nitric acid (65 %, product number 1.00441.1000) was obtained from Merck and was diluted with ultrapure water to provide 1 and 0.1 M nitric acid. The ultrapure water was obtained from a Milli-Q machine supplied by the Millipore Corporation. The deep eutectic solvent was formed by combining choline chloride and lactic acid.

### *General conditions*

All solvent extraction experiments were performed in triplicate, meaning that three shaking vials were used to gather data for each set of conditions.

All pipetting was done using the forward pipetting method using piston driven air displacement pipettes made by Gilson. Solvent extraction experiments were performed by pipetting equal volumes of an organic phase and either an aqueous phase or a deep eutectic solvent phase into a glass vial (3.5 ml). It was normal to add the aqueous or deep eutectic solvent phase before the addition of the organic phase to the vial. The phase ratio was checked by measuring the mass of the empty shaking vial, then again after the addition of the first liquid and then finally after the addition of the last liquid layer. When viscous liquids such as deep eutectic solvents and ionic liquids were pipetted; additional care was taken as these fluids require a greater time to flow out of the pipette tip. Additionally, filter tips were used to reduce the likelihood of the pipette becoming contaminated with a splash of the liquid. It was found that the moment when the push button of the pipette is released after the liquid had been ejected from the tip was the time when splashing of liquid upward was most likely to occur. After the liquids had been dispensed into the vial, it was sealed with a push on polyethylene cap before being shaken using a IKA Vibrax VXR basic machine equipped with a thermostated sample holder feed with warm water from a Grant TC120 circulating water bath. Unless otherwise stated all samples were shaken at 30°C. After shaking the samples were centrifuged (Heraeus Labofuge 200) at 3000 rotations per minute for at least five minutes to ensure good phase disengagement. Samples (200 µl) of the lower phase were taken using a Gilson pipette in the following manner. A pipette bearing a tip was set to the required volume, the push button depressed to the first stop before the tip was inserted into the lower phase. Through additional pressure on the button one or two bubbles

of air were expelled from the nozzle of the tip. The pressure on the push button was slowly relaxed allowing liquid to enter the tip. The pipette and tip were then removed from the shaking vial, using tissue paper the outside of the tip was wiped to remove any trace of the upper phase before the liquid inside the tip was dispensed into a preweighed polyethylene vial (17 ml). To the polyethylene vials was added dilute (0.1 M) nitric acid containing ruthenium (1–2 ppm). All samples and blanks used in an inductively coupled plasma optical emission run were made using a single batch of superpure nitric acid containing the same concentration of ruthenium. The ruthenium was present as an internal standard in case the operation of the ICPOES machine (Thermo Scientific iCAP6500) was subject to some variation. Normally the internal standard was not needed, but was present as a contingency against a pump or nebulizer malfunction. In some cases lower metal concentrations were used and an ICPMS (Inductively Coupled Plasma Mass Spectroscopy) machine (Thermo Scientific iCAP Q) was used in place of the ICPOES machine. The matrix for the ICPMS machine was nitric acid (1M) containing rhodium (25 parts per billion) as an internal standard.

### Specific experiments

- **Acceptor number measurement with the iron dye**

The iron containing dye was dissolved in a series of mixtures of DES and water. These were then examined with the lambda 19 spectrometer using the same settings as were used with the cobalt containing samples. The longest wavelength peak of the iron dye was used to calculate the acceptor number.

The results are shown in the following graph.

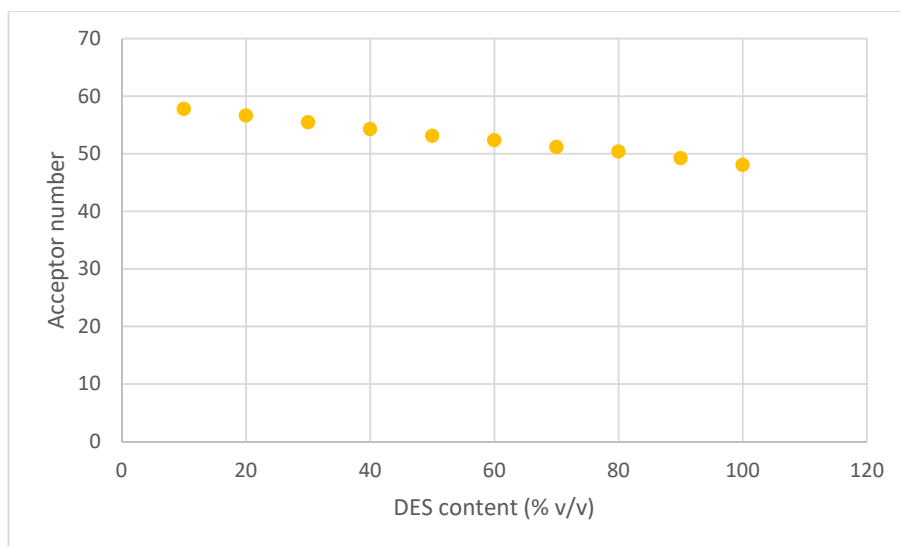

The results are shown as numbers in the following table.

| % DES | wavelength (nm) | wavelength (cm) | wavenumbers (cm-1) | Acceptor number |
|-------|-----------------|-----------------|--------------------|-----------------|
| 100   | 528             | 0,000528        | 1893,939394        | 48,03662        |
| 90    | 525             | 0,000525        | 1904,761905        | 49,2053         |
| 80    | 522             | 0,000522        | 1915,708812        | 50,37398        |
| 70    | 520             | 0,00052         | 1923,076923        | 51,1531         |
| 60    | 517             | 0,000517        | 1934,235977        | 52,32178        |
| 50    | 515             | 0,000515        | 1941,747573        | 53,1009         |
| 40    | 512             | 0,000512        | 1953,125           | 54,26958        |
| 30    | 509             | 0,000509        | 1964,636542        | 55,43825        |
| 20    | 506             | 0,000506        | 1976,284585        | 56,60693        |
| 10    | 503             | 0,000503        | 1988,071571        | 57,77561        |

Cobalt extractions by aliquat 336

Starting solutions made 1<sup>st</sup> August

Tubes 4031 to 4063 started 5<sup>th</sup> August 2016

A series of cobalt solutions in mixtures of DES and sodium chloride solution were made up according to the following table. The volume of the cobalt stock used as 250 microlitres.

| Name | Mass (g) |                   |                                       |                  |
|------|----------|-------------------|---------------------------------------|------------------|
|      | Empty    | With Cobalt stock | After adding sodium chloride solution | After adding DES |
| 95   | 6.6730   | 6.8927            | 7.1338                                | 18.1581          |
| 92.5 | 6.6592   | 6.8778            | 7.4007                                | 18.1455          |
| 90   | 6.7136   | 6.9334            | 7.7405                                | 18.2021          |
| 87.5 | 6.6458   | 6.8642            | 7.9521                                | 18.1639          |
| 85   | 6.6977   | 6.9164            | 8.2482                                | 18.0946          |
| 82.5 | 6.6829   | 6.9013            | 8.5264                                | 18.0993          |
| 80   | 6.6843   | 6.9026            | 8.8135                                | 18.1642          |
| 77.5 | 6.6472   | 6.8654            | 9.0554                                | 18.0855          |
| 75   | 6.7180   | 6.9359            | 9.3729                                | 18.1040          |
| 72.5 | 6.6714   | 6.8892            | 9.6094                                | 18.1025          |
| 70   | 6.7038   | 6.9180            | 9.9231                                | 18.1405          |

Using these solutions as the more dense phase and 30 % aliquat 336 in ethyl benzene as the lighter phase a series of shaking experiments were performed.

## Cadmium, zinc, palladium extractions by aliquat 336

Made solutions 25<sup>th</sup> July 2016, started extractions 27<sup>th</sup> July 2016

Tubes 3917 to 3961

A mixed metal stock was made in the following manner. Palladium(II) chloride (252 mg) was placed in an empty vial (14.9019 g). To this vial was added aqueous sodium chloride (6.4448 g of 3.61 M solution). The resulting mixture was heated in an oven until the palladium chloride dissolved. In a second vial (empty mass 14.8467 g) cadmium(II) oxide (418.2 mg) and zinc(II) oxide (467 mg) were combined with aqueous acetic acid (2 g of 25 % v/v). To this mixture was added sodium chloride solution (20 ml of 3.61 M solution), to the resulting mixture was added more 25 % (v/v) acetic acid (6 ml). At this point the metal oxides had dissolved. To the resulting solution was added nickel(II) chloride hexahydrate (1.335 g). The gross mass of the second vial at this point was 46.5726 g.

To the second vial was added the  $\text{Na}_2\text{PdCl}_4$  solution formed by dissolving palladium chloride in sodium chloride solution. The gross mass of the second vial was 53.0835 grams. To this vial was added water until the volume was *circa* 50 ml. The final gross mass of the vial was 70.4894 grams.

A series of solutions of cadmium, nickel, palladium and zinc in mixtures of sodium chloride solution and the DES was made up according to the following table.

| Name | Mass (g) |                  |                  |                                       |
|------|----------|------------------|------------------|---------------------------------------|
|      | Empty    | With metal stock | After adding DES | After adding sodium chloride solution |
| 95   | 6.6683   | 7.1886           | 18.2523          | 18.2523                               |
| 90   | 6.6782   | 7.1978           | 17.6476          | 18.1686                               |
| 85   | 6.7163   | 7.2355           | 17.1150          | 18.2011                               |
| 80   | 6.6454   | 7.1654           | 16.4400          | 18.1209                               |
| 70   | 6.6683   | 7.1873           | 15.3168          | 18.1322                               |
| 60   | 6.7166   | 7.2380           | 14.2023          | 18.1401                               |
| 50   | 6.6745   | 7.1941           | 13.0269          | 18.0916                               |
| 40   | 6.6827   | 7.2047           | 11.8876          | 18.0781                               |
| 30   | 6.6511   | 7.1733           | 10.6904          | 18.0307                               |
| 20   | 6.6738   | 7.1925           | 9.5299           | 17.9727                               |
| 10   | 6.6693   | 7.1772           | 8.3710           | 17.9309                               |

A 10 % (v/v) solution of aliquat 336 in ethyl benzene was formed by the dilution of the 30 % stock with more ethyl benzene. To an empty 50 ml volumetric flask (41.1845 g) was added two portions of 8.333 ml of the 30 % stock giving a gross mass of 55.8422 g. To this flask was then added ethyl benzene until the volume was 50 %. Thus giving a gross mass of 84.3580 grams.

In a similar manner a 20 % (v/v) solution of aliquat 336 was made in ethyl benzene.

The 10 % v/v solution of aliquat 336 was used with the mixtures containing between 10 and 80 % DES to perform solvent extraction experiments. The phase ratio was 1:1 and each shaking vial contained 600 microlitres of each phase.

The 20 % v/v solution of aliquat 336 was used with the mixture 70 % DES to perform solvent extraction experiments. The phase ratio was 1:1 and each shaking vial contained 600 microlitres of each phase.

The 30 % v/v solution of aliquat 336 was used with the mixtures containing between 70 and 95 % DES to perform solvent extraction experiments. The phase ratio was 1:1 and each shaking vial contained 600 microlitres of each phase.

With 10 % aliquat 336 in ethyl benzene it is clear that the distribution ratios of cadmium, palladium and zinc decrease exponentially as the DES content of the lower phase increases. The data for these three elements fit well to the following equations where x is the volume percentage of the DES in the lower layer

$$D_{Cd} = 3729.8 e^{-0.088 x}$$

$$D_{Zn} = 1054.2 e^{-0.086 x}$$

$$D_{Pd} = 200.69 e^{-0.076 x}$$

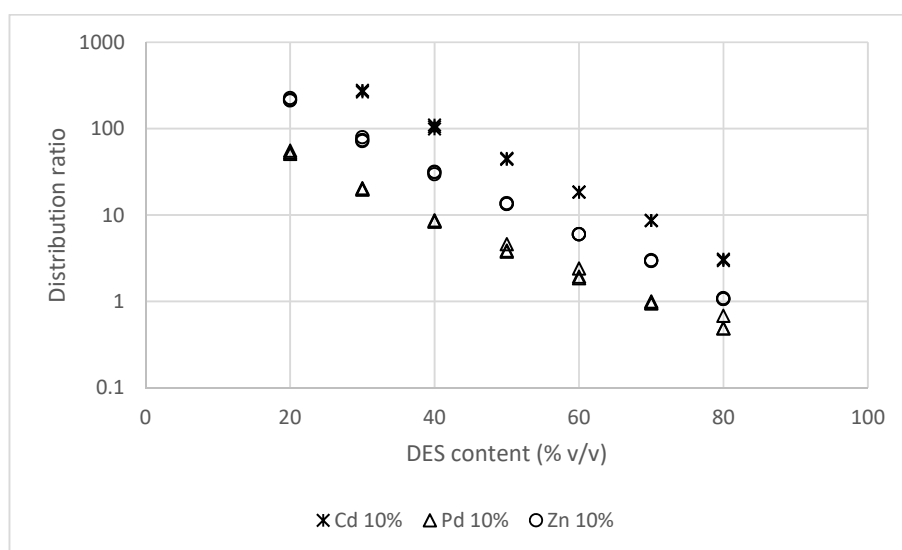

Similar results are obtained with 30 % (v/v) aliquat 336 in ethyl benzene. However for palladium in this system it is not possible to obtain good results, it is suspected that memory effects due to adsorption of palladium prevented the experiment using 30 % aliquat 336 from working well for palladium.

In this experiment with 30 % (v/v) aliquat the cadmium and zinc distribution ratios fitted well to the lines formed by the following equations.

$$D_{Cd} = 238393 e^{-0.126 x}$$

$$D_{Zn} = 39064 e^{-0.116 x}$$

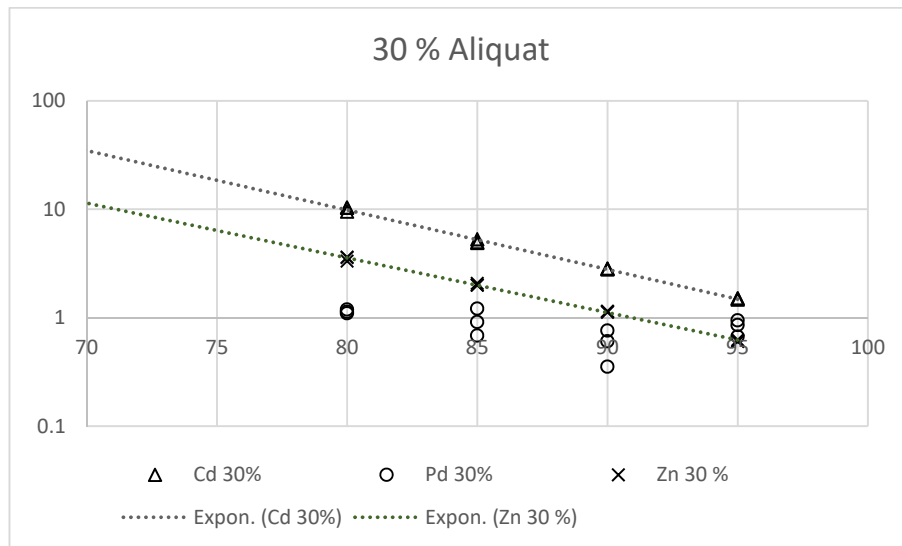

A variable aliquot experiment indicated that increasing the aliquot content promoted the extraction of cadmium, palladium and zinc. Note that as expected no nickel extraction was observed.

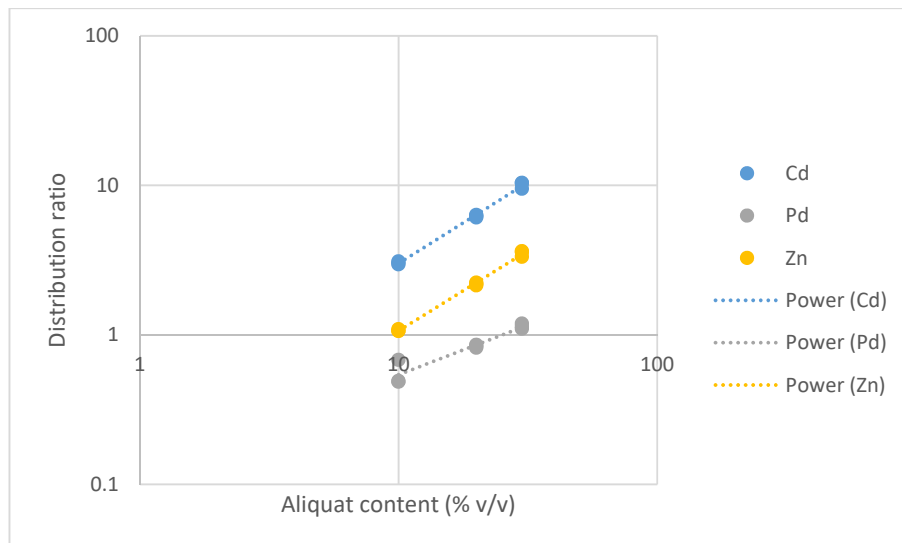

## Palladium and rhenium extraction by aliquat 336

Tubes 3980 to 4024 started 3<sup>rd</sup> August 2016

To an empty vial (14.3938 g) was added palladium(II) chloride (1.0769 g). To this was added aqueous sodium chloride (20 ml of 3.61 M) thus giving a gross mass of 22.9000 grams. This mixture was heated in an oven to cause the palladium chloride to react to form a solution of Na<sub>2</sub>PdCl<sub>4</sub>. The palladium solution thus obtained was filtered 3 days later through a 0.45 micrometer polypropylene syringe filter into a new vial (empty mass 14.3521 g) to form the palladium stock needed for this experiment.

In another vial ammonium perrhenate (557 mg of NH<sub>4</sub>ReO<sub>4</sub>) was dissolved in water (20 ml) to form the rhenium(VII) stock.

These metal solutions were used to form a series of solutions of palladium and rhenium in mixtures of sodium chloride and DES according to the following table. To each vial 250 microlitres of rhenium stock was used and 125 microlitres of palladium stock were used.

| Name | Mass (g) |               |                |                  |                  |
|------|----------|---------------|----------------|------------------|------------------|
|      | Empty    | With Re stock | After Pd stock | After NaCl stock | After adding DES |
| 0    | 6.6534   | 6.9162        | 7.0691         | 17.9694          | 17.9694          |
| 10   | 6.6939   | 6.9565        | 7.1175         | 16.9071          | 18.0794          |
| 20   | 6.7066   | 6.9693        | 7.1299         | 15.7789          | 18.1363          |
| 30   | 6.6846   | 9.9520        | 7.1091         | 14.6347          | 18.0949          |
| 40   | 6.6794   | 6.9454        | 7.1046         | 13.4836          | 18.1232          |
| 50   | 6.6662   | 6.9300        | 7.0888         | 12.3462          | 18.1515          |
| 60   | 6.6805   | 6.9460        | 7.1071         | 11.2217          | 18.1786          |
| 70   | 6.6900   | 6.9523        | 7.1111         | 10.1142          | 18.2338          |
| 80   | 6.7000   | 6.9636        | 7.1251         | 8.9927           | 18.2663          |
| 85   | 6.6973   | 6.9688        | 7.1321         | 8.4231           | 18.2820          |
| 90   | 6.6886   | 6.9563        | 7.1197         | 7.8359           | 18.2812          |
| 95   | 6.6935   | 6.9528        | 7.1122         | 7.2614           | 18.2674          |

Using the 80 % DES mixture a solvent extraction experiment was conducted with 5, 10, 20 and 30 % aliquat 336 in ethyl benzene. The 5 % aliquat solution was obtained by dilution of 30 % (v/v) aliquat 336 (1.6685 g) in ethyl benzene (8.7230 g). The other aliquat solutions were obtained from the preceding experiment.

Using the 10 % (v/v) aliquat 336 in ethyl benzene experiments were conducted with all the mixtures of DES and sodium chloride solutions. To reduce memory effects for palladium in the ICPOES machine the samples were diluted with superpure hydrochloric acid (83 ml of concentrated superpure hydrochloric acid 37 %) diluted to 1 litre with MQ water. Spiked with ruthenium (1 ppm) as an internal standard.



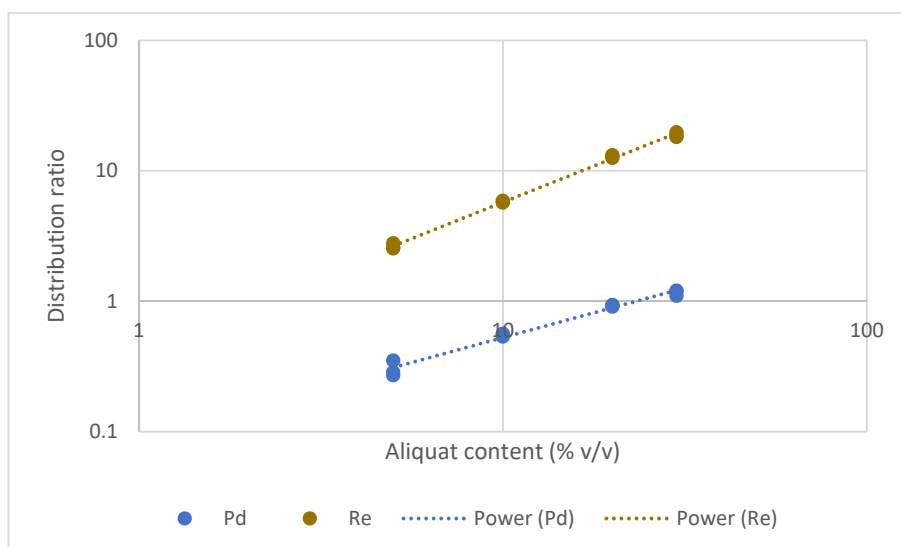

The results of the variable aliquat 336 experiment indicate that increasing the concentration of the aliquat promoted the extraction of both palladium and rhenium. It was interesting that the slope for palladium in the log log graph was only 0.76 while the slope for rhenium was 1.1. It is likely that a change in the activity coefficients in the organic phase as the aliquat concentration changed will have distorted the system away from one in which the solutes in the organic phase are in ideal solutions. It is also possible that the palladium in the organic phase will be in the form of  $[\text{Pd}_2\text{Cl}_6]^{2-}$  complexes or some other similar polynuclear complex. If these polynuclear complexes were to exist then one of the following mechanism would be operating.

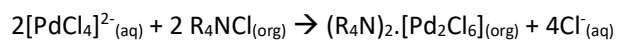

or

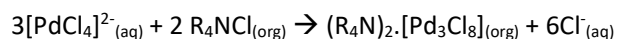

## Indium and gallium extraction by cyanex 923

A series of solutions of indium, gallium and other metals were made which contain the same analytical concentration of chloride but different ratios of water to DES according to the following table.

| Name     | Empty  | With gallium | After adding Re/Pd/In stock | After adding DES | After adding water | After adding Au stock | After adding NaCl stock |
|----------|--------|--------------|-----------------------------|------------------|--------------------|-----------------------|-------------------------|
| 95 % DES | 6.6595 | 6.7574       | 6.7719                      | 17.7822          | 18.1311            | 18.2311               | 18.2310                 |
| 90 % DES | 6.6846 | 6.7817       | 6.7966                      | 17.2419          | 17.5940            | 17.6943               | 18.2380                 |
| 85 % DES | 6.6408 | 6.7401       | 6.7548                      | 16.6089          | 16.9606            | 17.0618               | 18.1826                 |
| 80 % DES | 6.6737 | 6.7496       | 6.7644                      | 16.0382          | 16.3876            | 16.4885               | 18.1683                 |
| 75 % DES | 6.6737 | 6.7757       | 6.7904                      | 15.5215          | 15.8731            | 15.9737               | 18.2258                 |
| 70 % DES | 6.6300 | 6.7311       | 6.7456                      | 14.8774          | 15.2294            | 15.3303               | 18.1337                 |
| 65 % DES | 6.6181 | 6.7210       | 6.7355                      | 14.2981          | 14.6498            | 14.7512               | 18.1170                 |
| 60 % DES | 6.6166 | 6.7196       | 6.7341                      | 13.6852          | 14.0354            | 14.1386               | 18.0752                 |
| 55 % DES | 6.6672 | 6.7677       | 6.7825                      | 13.1755          | 13.5276            | 13.6284               | 18.1282                 |
| 50 % DES | 6.6543 | 6.7574       | 6.7721                      | 12.5833          | 12.9359            | 13.0372               | 18.0691                 |
| 45 % DES | 6.6694 | 6.7701       | 6.7848                      | 12.0241          | 12.3765            | 12.4785               | 18.0945                 |
| 40 % DES | 6.6821 | 6.7840       | 6.7987                      | 11.4341          | 11.7860            | 11.8880               | 18.0410                 |
| 35 % DES | 6.6457 | 6.7478       | 6.7630                      | 10.8298          | 11.1818            | 11.2837               | 18.0281                 |
| 30 % DES | 6.6945 | 6.7941       | 6.8091                      | 10.3019          | 10.6535            | 10.7557               | 18.0430                 |
| 25 % DES | 6.6660 | 6.7647       | 6.7797                      | 9.6895           | 10.0381            | 10.1402               | 18.0305                 |
| 20 % DES | 6.6427 | 6.7424       | 6.7572                      | 9.0808           | 9.4321             | 9.5346                | 17.9493                 |
| 15 % DES | 6.6691 | 6.7671       | 6.7817                      | 8.5324           | 8.8813             | 8.9831                | 17.9525                 |
| 10 % DES | 6.5827 | 6.6812       | 6.6958                      | 7.8619           | 8.2130             | 8.3150                | 17.8488                 |
| 5 % DES  | 6.6698 | 6.7658       | 6.7806                      | 7.3722           | 7.7206             | 7.8231                | 17.9358                 |

The gold solution was 1000 ppm gold in 1 % hydrochloric acid. The gallium solution was 1000 ppm gallium in 1 % nitric acid. The mixed indium, palladium and rhenium stock was made in the following manner. Indium oxide (391 mg  $\text{In}_2\text{O}_3$ ) was dissolved in hydrochloric acid (12 M 1.05 g). The resulting solution was diluted to 10 ml with water. This solution was mixed in a 2:1:1 volume ratio with palladium(II) chloride (32 g Pd per litre) dissolved in sodium chloride solution and ammonium perrhenate (16 g Re per litre) dissolved in water. The distribution ratios for rhenium, palladium and gold were either too high or too low to be useful.

## Zinc extractions with cyanex301

*Variable cyanex 301 concentration, tubes 3818 to 3853, 21 July 2016*

To an empty plastic vial (14.9947 g) was added zinc oxide (46 mg) and cadmium(II) carbonate (20 mg). To this vial was added 25 % (v/v) acetic acid (1 ml) and water (9 ml). The resulting mixture was shaken until it became clear. The gross mass of the vial was 25.2223 g. To the vial was added DES (40 ml). The gross mass of the vial was then 72.1745 g. The vial was sealed and shaken before use.

A solution of cyanex 301 (2.5453 g) in a 25 ml volumetric flask was made using solvent 70 as the diluent. The net mass of the reagent and diluent was 20.3716 grams. This stock solution was used for a solvent extraction experiment. The stock was diluted according to the following table

| Intended dilution | Volume of stock used (ml) | Volume of solvent 70 used (ml) | Empty mass (g) | With solvent 70 (g) | Total mass (g) |
|-------------------|---------------------------|--------------------------------|----------------|---------------------|----------------|
| x 2               | 5.0                       | 5.0                            | 18.3629        | 22.3582             | 26.2751        |
| x 4               | 2.5                       | 7.5                            | 18.6285        | 24.6220             | 26.5488        |
| x 8               | 1.25                      | 8.75                           | 18.4071        | 25.4157             | 26.3711        |
| x 16              | 0.625                     | 9.375                          | 18.3258        | 25.8332             | 26.3038        |
| x 32              | 0.3125                    | 9.688                          | 18.3678        | 26.1570             | 26.3760        |

Using these mixtures of cyanex 301 and solvent 70 together with the solution of cadmium and zinc in wet DES a solvent extraction experiment was conducted. The phase ratio was 1:1 and the volume of each phase was 700 microlitres.

This solution of zinc and cadmium in wet DES was shaken in vials with solutions of cyanex301 in solvent 70. The DES and organic layers had a volume of 700 microlitres.

The results are summarized in the following graph.

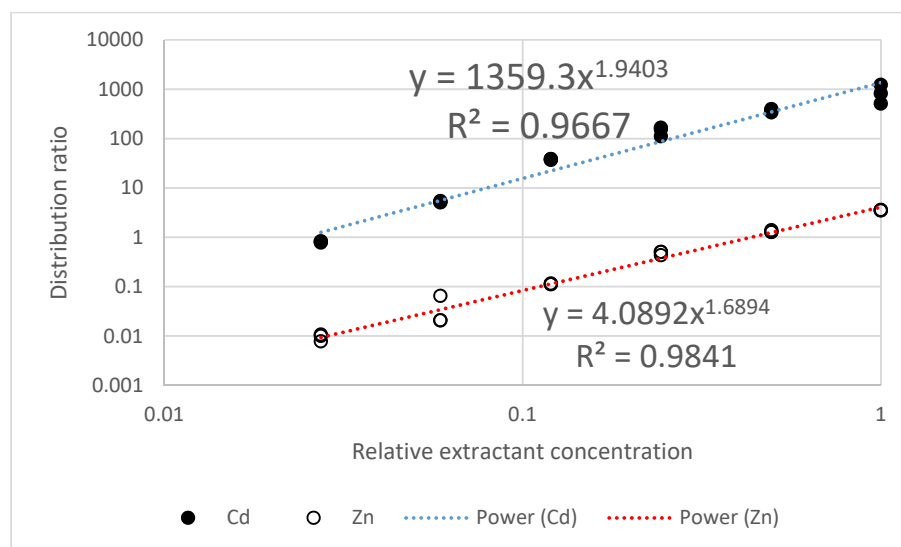

The results are shown in the following table.

| Tube number            | 3818 | 3819 | 3820 | 3839 | 3840 | 3841 |
|------------------------|------|------|------|------|------|------|
| Relative concentration | 1    | 1    | 1    | 0,5  | 0,5  | 0,5  |

|        |          |          |          |          |          |          |
|--------|----------|----------|----------|----------|----------|----------|
| Cd2144 | 508,4195 | 815,2081 | 1218,156 | 336,8237 | 373,8494 | 392,544  |
| Cd2265 | 528,9926 | 864,97   | 1295,491 | 349,5137 | 387,0494 | 404,4819 |
| Cd2288 | 508,3981 | 834,8319 | 1213,55  | 338,4254 | 373,1115 | 392,0026 |
| Zn2025 | 3,319673 | 3,363535 | 3,426456 | 1,330436 | 1,221616 | 1,228285 |
| Zn2062 | 3,457348 | 3,507662 | 3,559627 | 1,379753 | 1,274703 | 1,271541 |
| Zn2138 | 3,195276 | 3,273608 | 3,378511 | 1,269465 | 1,163493 | 1,195738 |

|                        |          |          |          |          |          |          |
|------------------------|----------|----------|----------|----------|----------|----------|
| Tube number            | 3842     | 3843     | 3844     | 3845     | 3846     | 3847     |
| Relative concentration | 0,25     | 0,25     | 0,25     | 0,125    | 0,125    | 0,125    |
| Cd2144                 | 110,836  | 165,3022 | 153,4598 | 36,79443 | 38,19367 | 37,90364 |
| Cd2265                 | 113,3104 | 170,1089 | 156,258  | 37,52886 | 38,70365 | 38,57058 |
| Cd2288                 | 109,8858 | 165,2319 | 151,3027 | 36,48231 | 37,38414 | 37,55448 |
| Zn2025                 | 0,415116 | 0,486619 | 0,487774 | 0,114627 | 0,111628 | 0,117487 |
| Zn2062                 | 0,430758 | 0,501613 | 0,501384 | 0,112118 | 0,111171 | 0,115192 |
| Zn2138                 | 0,398554 | 0,474914 | 0,499076 | 0,129567 | 0,126375 | 0,123268 |

|                        |          |          |          |          |          |          |
|------------------------|----------|----------|----------|----------|----------|----------|
| Tube number            | 3848     | 3849     | 3850     | 3851     | 3852     | 3853     |
| Relative concentration | 0,0625   | 0,0625   | 0,0625   | 0,03125  | 0,03125  | 0,03125  |
| Cd2144                 | 5,377461 | 5,152775 | 5,051994 | 0,77451  | 0,81432  | 0,823438 |
| Cd2265                 | 5,467226 | 5,300322 | 5,163957 | 0,78849  | 0,82724  | 0,835173 |
| Cd2288                 | 5,457011 | 5,179519 | 5,022187 | 0,768889 | 0,815592 | 0,814911 |
| Zn2025                 | 0,13372  | 0,024784 | 0,027324 | 0,012758 | 0,023086 | 0,016278 |
| Zn2062                 | 0,06471  | 0,020533 | 0,020749 | 0,007737 | 0,010632 | 0,009967 |
| Zn2138                 | 0,260007 | 0,042691 | 0,048266 | 0,027465 | 0,047781 | 0,03707  |

*Thermodynamics of stripping of metals from cyanex301 / solvent 70*

A series of solutions of metals in sulfuric acid which were originally made for tubes 2045 to 2059 (An experiment on relating to the stripping of metals from DEHPA which has been published in Cogent Chemistry) were used for an experiment with the cyanex301 stock.

|                                        |          |         |          |          |          |
|----------------------------------------|----------|---------|----------|----------|----------|
| Masses (g)                             |          |         |          |          |          |
| Empty                                  | 6,6533   | 6,649   | 6,6465   | 6,6436   | 6,6087   |
| With 1M H <sub>2</sub> SO <sub>4</sub> | 16,6523  | 11,8506 | 8,6862   | 7,6944   | 7,1305   |
| With metals                            | 16,9208  | 12,1218 | 8,9612   | 7,9661   | 7,4028   |
| With Cu / Mn / Ni                      | 17,1844  | 12,3873 | 9,2268   | 8,2315   | 7,6683   |
| With MQ water                          | 17,184   | 16,7966 | 16,637   | 16,6724  | 16,789   |
| Volumes (ml)                           |          |         |          |          |          |
| 1M H <sub>2</sub> SO <sub>4</sub>      | 9,433019 | 4,90717 | 1,924245 | 0,991321 | 0,492264 |
| Metal stock                            | 0,2685   | 0,2712  | 0,275    | 0,2717   | 0,2723   |
| Cu / Ni / Mn stock                     | 0,2636   | 0,2655  | 0,2656   | 0,2654   | 0,2655   |
| Water                                  | 0        | 4,4093  | 7,4102   | 8,4409   | 9,1207   |
|                                        |          |         |          |          |          |
| Acid content                           | 0,946642 | 0,49803 | 0,194859 | 0,099437 | 0,048495 |

When these solutions were shaken with the solution of cyanex301 it was impossible to detect cadmium in the aqueous phases which had been shaken with the organic layer. In all cases the zinc distribution ratio was greater than 200 suggesting that it will be impossible to strip zinc using aqueous sulfuric acid. Tube numbers 3854 to 3868. As a result the data for this experiment was not fully processed.

*The relationship between water content of the DES layer and the distribution ratio*

Tube numbers 3884 to 3916. The mixed Cd/Ni/Pd/Zn DES / sodium chloride mixtures used for the experiment with aliquat 336 in ethyl benzene was used for this experiment. Cyanex301 (5.1209 g) was placed in a 50 ml volumetric flask, the extractant was diluted to 50 ml with solvent 70 to form a solution with a relative density of 0.816.

These solutions of the four metals were shaken with the new solution of cyanex301 in solvent 70 at 30 °C for at least four hours. Some solid appeared in the tubes at first, this redissolved to form two clear layers. The solid may have been palladium sulfide formed by the trace of H<sub>2</sub>S in the extractant. After shaking and centrifugation the contents of the tubes were examined with ICPOES, due to a spray chamber malfunction in the ICPOES the samples for 30 and 70 % needed to be diluted further and reexamined with the ICPMS.

The zinc distribution ratios were too high when the DES content was only 10 or 20 % to be used. Also the nickel and palladium distribution ratios were too high to be of use. When the DES content was below 80 % (v/v) the cadmium distribution ratios were too high to be trustworthy.

The cadmium data can be seen in the following graph.

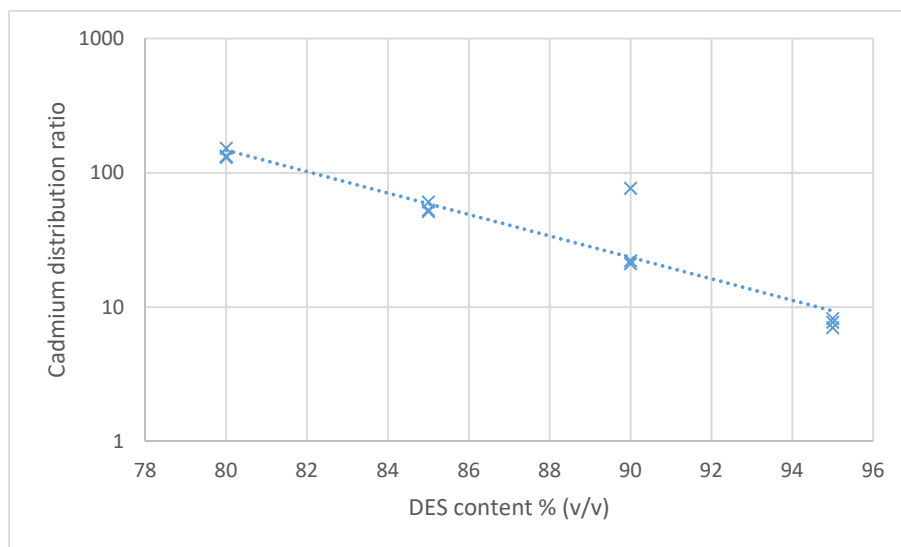

The distribution ratios are listed in the following tables.

|                         |          |          |          |          |          |          |
|-------------------------|----------|----------|----------|----------|----------|----------|
| DES contents %<br>(v/v) | 10       | 10       | 10       | 20       | 20       | 20       |
| D <sub>Cd</sub>         | 511,1422 | 596,8971 | 1032,64  | 945,8963 | 987,1814 | 799,2422 |
| D <sub>Zn</sub>         | 352,0886 | 379,2415 | 582,6928 | 207,5466 | 205,7144 | 173,2705 |

|                         |      |      |      |          |          |          |
|-------------------------|------|------|------|----------|----------|----------|
| DES contents %<br>(v/v) | 30   | 30   | 30   | 40       | 40       | 40       |
| D <sub>Cd</sub>         | 497  | 1709 | 577  | 1850,327 | 1313,661 | 1664,106 |
| D <sub>Zn</sub>         | 67,4 | 76,8 | 68,1 | 31,45919 | 31,08413 | 29,8018  |

|                         |          |          |          |          |          |          |
|-------------------------|----------|----------|----------|----------|----------|----------|
| DES contents %<br>(v/v) | 50       | 50       | 50       | 60       | 60       | 60       |
| D <sub>Cd</sub>         | 365,6545 | 329,3285 | 350,3243 | 692,5019 | 888,3016 | 695,1807 |
| D <sub>Zn</sub>         | 10,7319  | 10,88957 | 10,67251 | 3,684637 | 3,631351 | 3,589869 |

|                         |      |      |      |          |          |          |
|-------------------------|------|------|------|----------|----------|----------|
| DES contents %<br>(v/v) | 70   | 70   | 70   | 80       | 80       | 80       |
| D <sub>Cd</sub>         | 283  | 502  | 413  | 133,007  | 129,9982 | 152,4495 |
| D <sub>Zn</sub>         | 1,24 | 1,22 | 1,21 | 0,300651 | 0,283954 | 0,293866 |

|                         |          |          |         |
|-------------------------|----------|----------|---------|
| DES contents %<br>(v/v) | 85       | 85       | 85      |
| D <sub>Cd</sub>         | 60,55328 | 51,38861 | 52,6929 |
| D <sub>Zn</sub>         | 0,13806  | 0,143423 | 0,14417 |

|                         |          |          |          |          |          |          |
|-------------------------|----------|----------|----------|----------|----------|----------|
| DES contents %<br>(v/v) | 90       | 90       | 90       | 95       | 95       | 95       |
| D <sub>Cd</sub>         | 76,63659 | 22,07683 | 21,02534 | 8,233383 | 7,709772 | 7,033098 |
| D <sub>Zn</sub>         | 0,072339 | 0,050002 | 0,045516 | 0,026647 | 0,031808 | 0,030214 |

### Effect of sodium lactate

Tubes 3869 to 3883, 25 July 2016.

The effect of sodium lactate on the extraction of zinc by cyanex301 from a 8:2 DES / water mixture was examined. Tube numbers 3869 to 3883.

The organic phase was the same cyanex301 solution as was used in the variable water content experiment. The volumes of the two layers were 600 microlitres, overnight shaking at 30 °C was used.

The DES phases were made by combining the Cd/Ni/Pd/Zn metal stock with DES, sodium hydroxide solution and water to maintain the water content and ionic strength at constant values. The sodium hydroxide solution was 6.75 M (density 1.242). The details of the vials are in the following table.

| Working name | Lactate concentration | Mass (g) |                  |          |                                |            |
|--------------|-----------------------|----------|------------------|----------|--------------------------------|------------|
|              |                       | Empty    | With metal stock | With DES | With sodium hydroxide solution | With water |
| No NaOH      |                       | 6,7081   | 7,2271           | 16,5489  | 16,5484                        | 17,9639    |
| 0.05 ml NaOH |                       | 6,6699   | 7,1889           | 16,5005  | 16,5624                        | 17,9353    |
| 0.1 ml NaOH  |                       | 6,6451   | 7,1684           | 16,4398  | 16,5629                        | 17,8830    |
| 0.2 ml NaOH  |                       | 6,6827   | 7,2001           | 16,5445  | 16,7912                        | 18,0107    |
| 0.4 ml NaOH  |                       | 6,7194   | 7,2269           | 16,5185  | 17,0093                        | 18,0347    |

As before the nickel and palladium distribution ratios were too high to be measured. The cadmium distribution ratios are too high.

The results can be seen in the following graph.

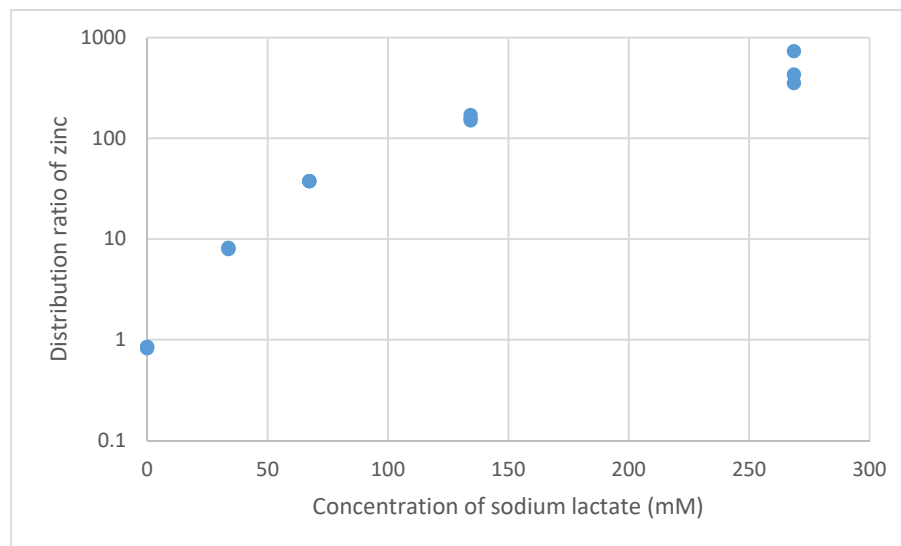

The data for zinc is shown in the following tables.



|                        |             |             |             |             |             |             |
|------------------------|-------------|-------------|-------------|-------------|-------------|-------------|
| Tube                   | <b>3869</b> | <b>3870</b> | <b>3871</b> | <b>3872</b> | <b>3873</b> | <b>3874</b> |
| Sodium lactate conc mM | 0           | 0           | 0           | 33,8        | 33,8        | 33,8        |
| D <sub>Zn</sub>        | 0,820655    | 0,84636     | 0,846614    | 8,181815    | 8,033602    | 7,919809    |

|                        |             |             |             |             |             |             |
|------------------------|-------------|-------------|-------------|-------------|-------------|-------------|
| Tube                   | <b>3875</b> | <b>3876</b> | <b>3877</b> | <b>3878</b> | <b>3879</b> | <b>3880</b> |
| Sodium lactate conc mM | 67,4        | 67,4        | 67,4        | 134         | 134         | 134         |
| D <sub>Zn</sub>        | 37,56563    | 37,51572    | 37,4481     | 157,0863    | 170,1744    | 150,3661    |

|                        |             |             |             |
|------------------------|-------------|-------------|-------------|
| Tube                   | <b>3881</b> | <b>3882</b> | <b>3883</b> |
| Sodium lactate conc mM | 269         | 269         | 269         |
| D <sub>Zn</sub>        | 429,1617    | 353,1155    | 732,1141    |

*Effect of sulfuric acid on the zinc distribution ratio.*

Tubes 3962 to 3979. 1<sup>st</sup> August 2016.

The effect of sulfuric acid in the 8:2 DES / water mixture was investigated by a similar method as to that used for the effect of sodium lactate.

To 17 ml polyethene vials was added Cd/Ni/Pd/Zn stock solution, sulfuric acid (1 M), water and DES to form a range of mixtures.

Tube numbers 3962 to 3979.

The results for zinc can be summarized in the following graph.

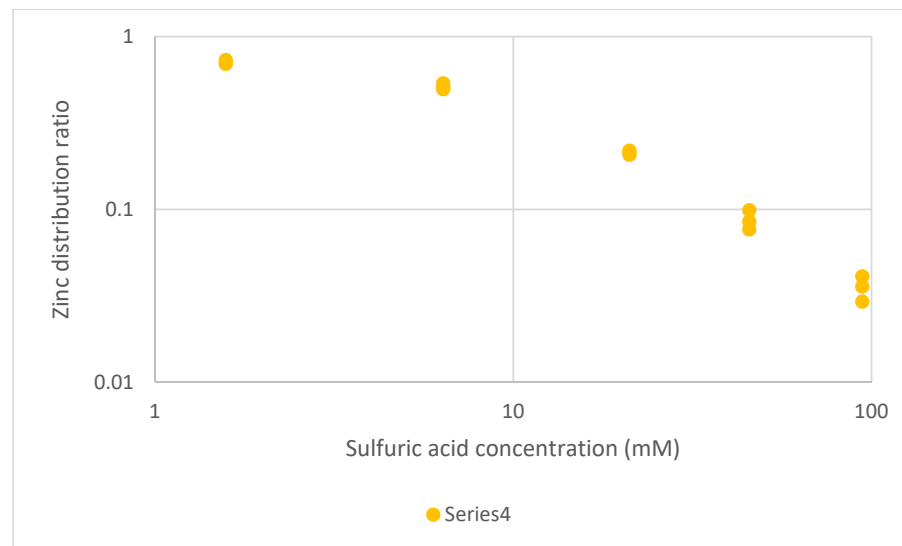

The results are also summed up in the following tables.

| Concentration of sulfuric acid (mM) | 0                  | 0           | 0           |
|-------------------------------------|--------------------|-------------|-------------|
| Metal                               | Distribution ratio |             |             |
| Cd                                  | 339,7993           | 443,6609456 | 452,9861924 |
| Ni                                  | 1189,842           | 1287,680943 | 1280,952821 |
| Pd                                  | 1141,727           | 1407,22963  | 990,6970837 |
| Zn                                  | 0,766473           | 0,844704061 | 0,848453393 |

| Concentration of sulfuric acid (mM) | 1.58               | 1.58     | 1.58     |
|-------------------------------------|--------------------|----------|----------|
| Metal                               | Distribution ratio |          |          |
| Cd                                  | 319,6806819        | 363,7765 | 414,1648 |
| Ni                                  | 928,0059061        | 987,6483 | 985,8054 |
| Pd                                  | 829,4226688        | 833,2436 | 952,3474 |
| Zn                                  | 0,730791672        | 0,707798 | 0,69554  |

| Concentration of sulfuric acid (mM) | 6.38               | 6.38     | 6.38     |
|-------------------------------------|--------------------|----------|----------|
| Metal                               | Distribution ratio |          |          |
| Cd                                  | 221,921            | 500,9513 | 245,7545 |

|    |          |          |          |
|----|----------|----------|----------|
| Ni | 1029,224 | 619,0853 | 1259,192 |
| Pd | 741,5857 | 616,5955 | 993,5275 |
| Zn | 0,535051 | 0,512674 | 0,495455 |

|                                     |                    |          |          |
|-------------------------------------|--------------------|----------|----------|
| Concentration of sulfuric acid (mM) | 21.1               | 21.1     | 21.1     |
| Metal                               | Distribution ratio |          |          |
| Cd                                  | 121,668            | 157,8989 | 137,0147 |
| Ni                                  | 14,1964            | 10,76152 | 10,65136 |
| Pd                                  | 16,74736           | 12,9533  | 12,75792 |
| Zn                                  | 0,2126             | 0,21842  | 0,206781 |

|                                     |                    |          |          |
|-------------------------------------|--------------------|----------|----------|
| Concentration of sulfuric acid (mM) | 45.6               | 45.6     | 45.60    |
| Metal                               | Distribution ratio |          |          |
| Cd                                  | 56,54999           | 44,91237 | 40,43027 |
| Ni                                  | 2,63703            | 3,026454 | 6,325083 |
| Pd                                  | 3,316082           | 3,765395 | 7,683434 |
| Zn                                  | 0,0986             | 0,084843 | 0,076495 |

|                                     |                    |          |          |
|-------------------------------------|--------------------|----------|----------|
| Concentration of sulfuric acid (mM) | 94.4               | 94.4     | 94.4     |
| Metal                               | Distribution ratio |          |          |
| Cd                                  | 8,516198           | 7,858898 | 12,22166 |
| Ni                                  | 1,23289            | 1,350132 | 1,674163 |
| Pd                                  | 1,639707           | 1,774989 | 2,161408 |
| Zn                                  | 0,040881           | 0,035679 | 0,02922  |

Thermochromism of the cobalt solutions.

A series of cobalt solutions were made by diluting an aqueous cobalt chloride (8 grams per litre cobalt) in a mixture of water and the DES according to the following table of masses. The solutions were made up in 17 ml ICP vials.

| Name     | Empty  | With DES | After adding cobalt stock | After adding water |
|----------|--------|----------|---------------------------|--------------------|
| 95 % DES | 6.7019 | 17.7700  | 18.2828                   | 18.2828            |
| 90 % DES | 6.6753 | 17.1689  | 17.6797                   | 18.1671            |
| 85 % DES | 6.7003 | 16.6183  | 17.1348                   | 18.1183            |
| 80 % DES | 6.6892 | 16.0304  | 16.5440                   | 18.0292            |
| 75 % DES | 6.7058 | 15.4586  | 15.9721                   | 17.9364            |
| 70 % DES | 6.6990 | 14.8803  | 15.3943                   | 17.8485            |
| 65 % DES | 6.7144 | 14.3033  | 14.8140                   | 17.7640            |
| 60 % DES | 6.6887 | 13.7120  | 14.2289                   | 17.6701            |

The tubes were violently shaken before being heated in a beaker of water at 70 °C. The tubes were taken out of the beaker and quickly placed in a testtube rack. The tubes were placed (left to right) in order of increasing water content. Before being photographed.

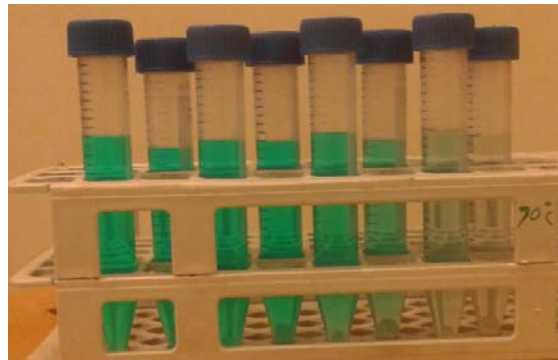

Photograph 1. Photograph of the tubes are 70 °C

The tubes were then placed in a beaker filled with a mixture of ice and water. After several hours in the beaker the tubes were again placed in the same order in the testtube rack. Again the tubes were photographed.

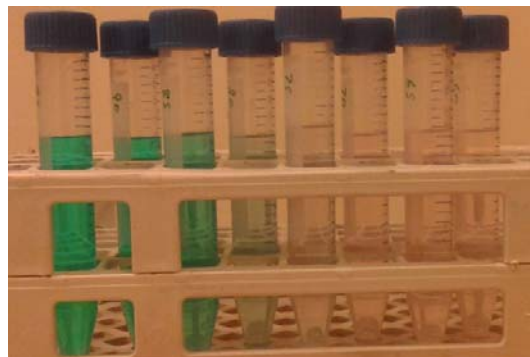

Photograph 2. Photograph of the tubes at 0 °C
